# Supplementary material for: Elevated CO2 Alters the Physiological and Transcriptome Responses of Pinus densiflora to Long-Term CO2 Exposure
Source: MDPI journal article supplement (doi:10.3390/plants11243530), 2022-12-15
Supplement: s1 [file s1]

**Supplementary Table S1. Primers of qPCR in *Pinus Densiflora***

| Gene   | Forward primer (5'→3') | Reverse primer (5'→3') |
|--------|------------------------|------------------------|
| GAPCP2 | CAGCCTGGACAACAAGATCA   | CTGCTTCCCACTCTCCACAT   |
| PGK3   | ACAGTCTGCAACCTGTCGTG   | GCTTTGACCTTCTTGCCATC   |
| PGM    | CCGTCGGGTATAAAGGGATT   | ATTCTCGGGACTCCTTGGTT   |
| PPDK   | GCCGTCTACGACCAACTGAT   | AGTGTCTCGGTGTCGTCGAT   |
| CAT2   | CAAGACTACCGACCCACTCG   | GTGTTGTTGGCAACCATGTC   |
| CAT3   | TACCACGAGTGCAAGGTCAG   | TCTCGCCATGCTTGTAGTTG   |
| APXS   | TCACCTCAAGCAACTGCAAC   | CTCGTACTCGTCTGCGACTG   |
| APX5   | CTTGAGCCCCAGAAGAACTG   | ACCAGGTGTGAAGGGAACAG   |
| LHCB7  | ATCTCTGTCTGCCAGGTGCT   | GCCGTTTTTGATTTCCTTGA   |
| LHCA1  | CAGGTTCAGGGAGAGTGAGC   | TGCAATGAGGGTGTTGATGT   |
| RCA    | GTCCCCCTGATTCTGGGTAT   | ACATCCTGCCCTTCTTGATG   |
| PGK1   | ACTGCCAAGTGGAAGCAGT    | TCGGTGATCTTCTGGCTCTT   |
| FKFBP  | CAGTCCTCGTGGTTTCCAAT   | TGTGAGACCGTCGCAGTTAC   |
| PGMP   | TGGAAGTTCTTCTGCGGTCT   | AAGTCGTGCTGGATGCTCTT   |
| CYFBP  | TGGTGGTATCTTCGCCTACC   | TCTGCACCTCGTCGTAAGT    |
| PHS2   | GAACTGCGATTGAAGCAACA   | CTCAAGGCCTTCCAAGTCAG   |
| U2af   | TCGGGAGGTTGGGTCTACAT   | ACCAGTCCTTCAGTCCCCTT   |
| β-TUB  | GTCGTGAATCATGGCATGGC   | GCCTCACTATCGGTTTCCCA   |
