# Supplementary material for: Elevated CO2 Alters the Physiological and Transcriptome Responses of Pinus densiflora to Long-Term CO2 Exposure
Source: MDPI journal article supplement (doi:10.3390/plants11243530), 2022-12-15
Supplement: s1 [file s1]

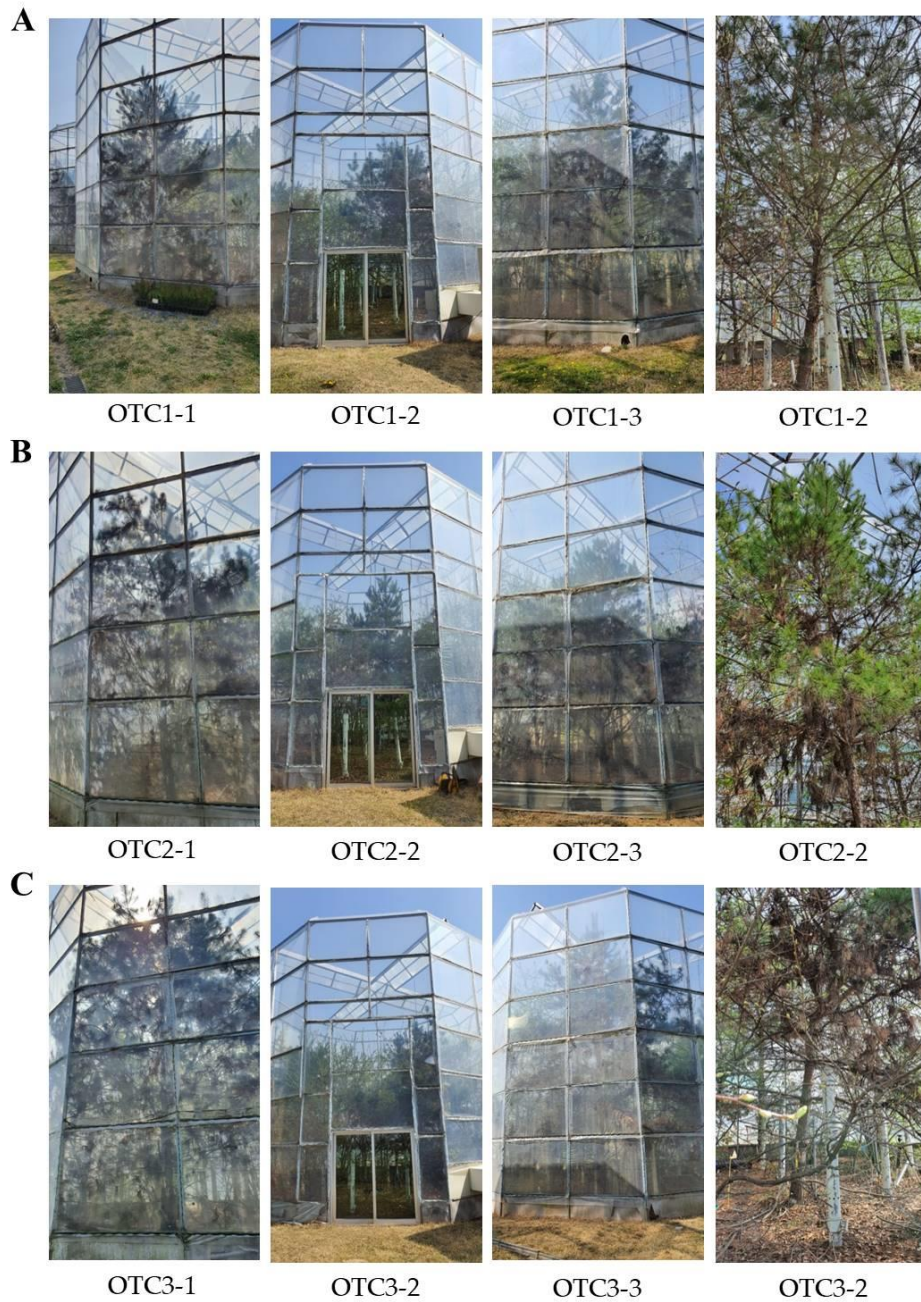

**Supplementary Figure S1. The photographs of nine *Pinus Densiflora* in Open-Top Chambers (OTCs).** (A) Three pine trees in OTC1 facility. There are OTC1-1, OTC1-2, OTC1-3 from the left in the picture. (B) Three pine trees in OTC2 facility. There are OTC2-1, OTC2-2, OTC2-3 from the left in the picture. (C) Three pine trees in OTC3 facility. There are OTC3-1, OTC3-2, OTC3-3 from the left in the picture.
