# Supplementary material for: Elevated CO2 Alters the Physiological and Transcriptome Responses of Pinus densiflora to Long-Term CO2 Exposure
Source: MDPI journal article supplement (doi:10.3390/plants11243530), 2022-12-15
Supplement: s1 [file s1]

**Supplementary Table S2. Genes/transcripts information of qPCR in *Pinus Densiflora***

| Pine tree transcripts name | Arabidopsis<br>Gene symbol | Arabidopsis Description                                     |
|----------------------------|----------------------------|-------------------------------------------------------------|
| TRINITY_DN58729_c0_g1_i1   | <i>LHCA1</i>               | Chlorophyll a-b binding protein                             |
| TRINITY_DN78962_c0_g1_i2   | <i>LHCB7</i>               | Chlorophyll a-b binding protein 7                           |
| TRINITY_DN87649_c0_g1_i1   | <i>RCA</i>                 | Ribulose biphosphate carboxylase/oxygenase<br>activase      |
| TRINITY_DN63836_c0_g1_i1   | <i>PGK1</i>                | Phosphoglycerate kinase                                     |
| TRINITY_DN35036_c0_g1_i5   | <i>CYFBP</i>               | Cytosolic fructose-1,6-bisphosphatase                       |
| TRINITY_DN147783_c0_g2_i1  | <i>FKFBP</i>               | Fructose-2,6-bisphosphatase                                 |
| TRINITY_DN26074_c0_g1_i4   | <i>PHS2</i>                | Cytosolic alpha-glucan phosphorylase 2                      |
| TRINITY_DN64563_c1_g1_i5   | <i>PGMP</i>                | Chloroplastic phosphoglucomutase                            |
| TRINITY_DN64994_c0_g1_i2   | <i>PGM</i>                 | Phosphoglycerate mutase-like protein                        |
| TRINITY_DN34875_c0_g6_i2   | <i>PGK3</i>                | Phosphoglycerate kinase                                     |
| TRINITY_DN99376_c0_g1_i4   | <i>CAPCP2</i>              | Chloroplastic glyceraldehyde-3-phosphate<br>dehydrogenase 2 |
| TRINITY_DN5478_c3_g1_i3    | <i>PPDK</i>                | Chloroplastic phosphate dikinase 1                          |
| TRINITY_DN60793_c0_g1_i1   | <i>APX5</i>                | Peroxisomal L-ascorbate peroxidase 5                        |
| TRINITY_DN19267_c0_g1_i6   | <i>APXS</i>                | Chloroplastic/mitochondrial L-ascorbate<br>peroxidase S     |
| TRINITY_DN169836_c0_g1_i4  | <i>CAT2</i>                | Catalase 2                                                  |
| TRINITY_DN278558_c0_g1_i1  | <i>CAT3</i>                | Catalase 3                                                  |
